# Supplementary material for: Oxidatively stressed extracellular microenvironment drives fibroblast activation and kidney fibrosis
Source: PubMed Central journal article supplement — Redox Biol. 2023 Sep 1;67:102868. doi: 10.1016/j.redox.2023.102868 (PMC10497796; doi:10.1016/j.redox.2023.102868), 2023-09-01

Figure 1F

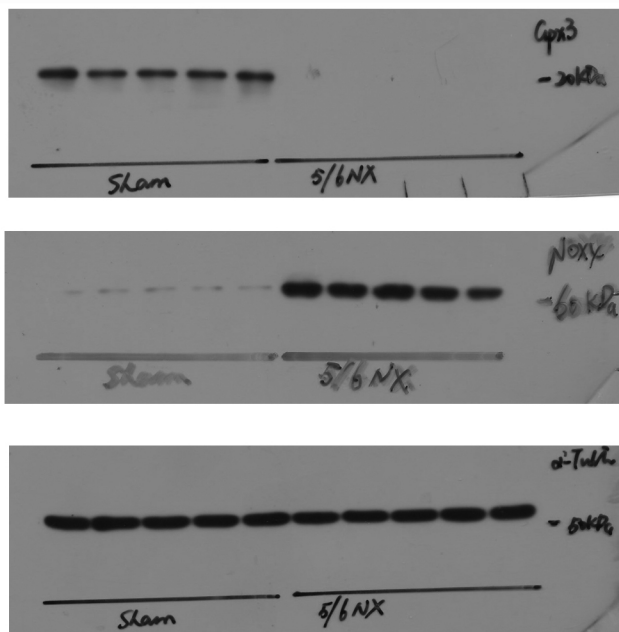

Figure 1H

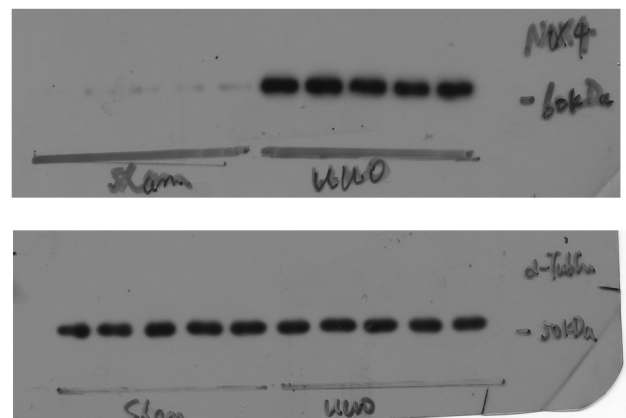

Figure 1J

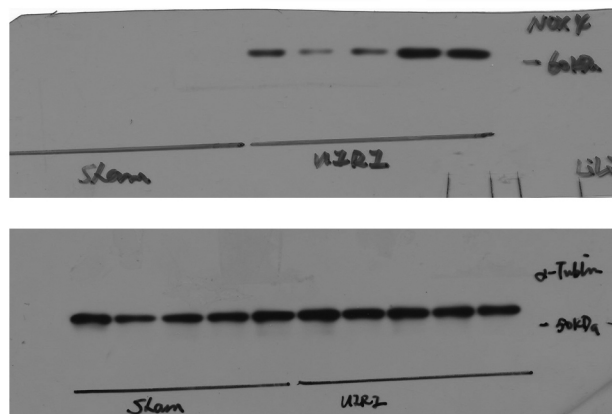

Figure 2B

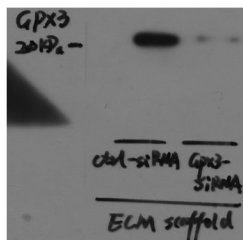

Figure 2E

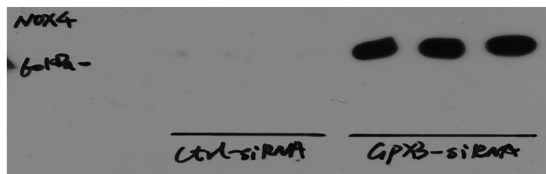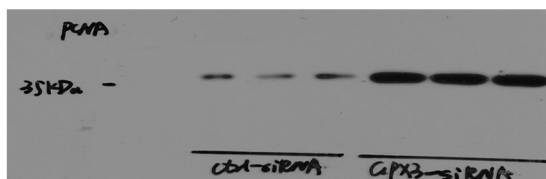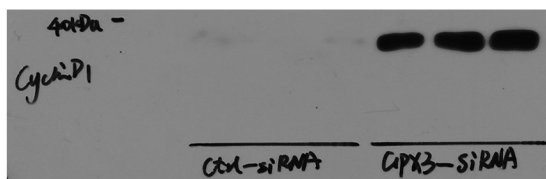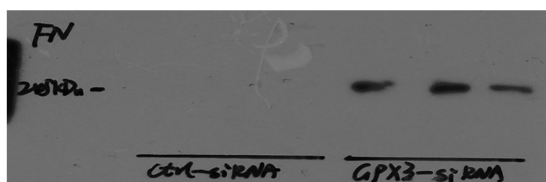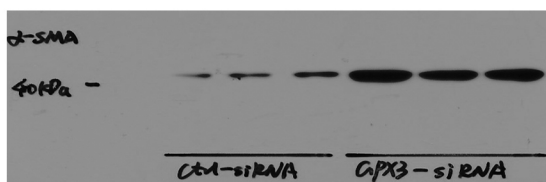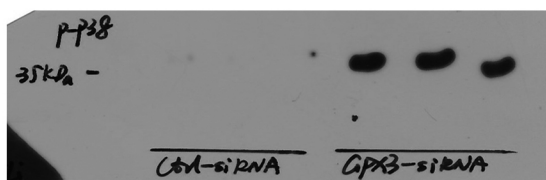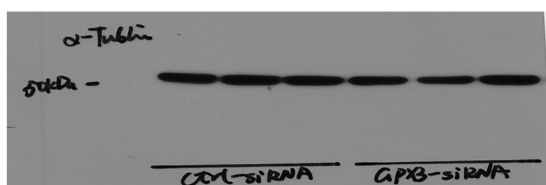

Figure 2I

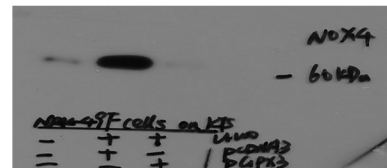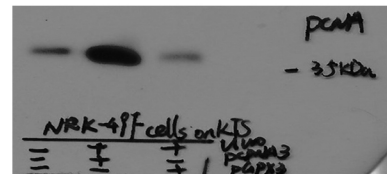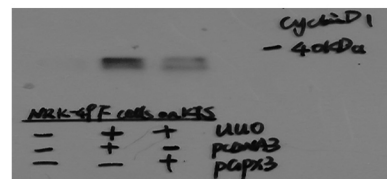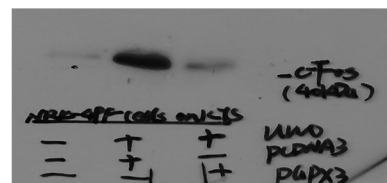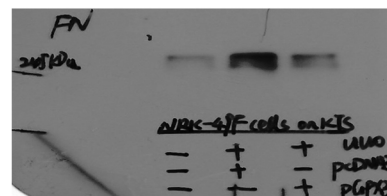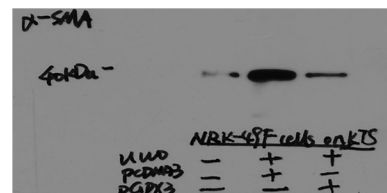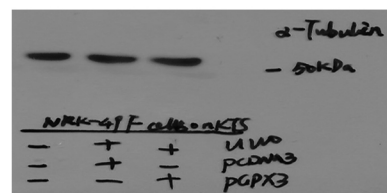

Figure 2H

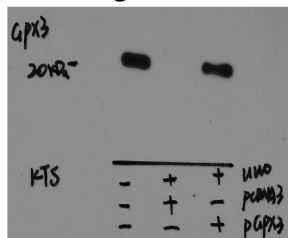

Figure 3A

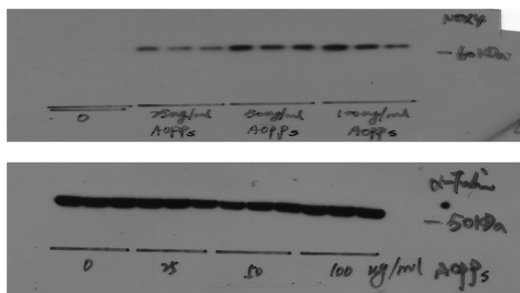

Figure 3C

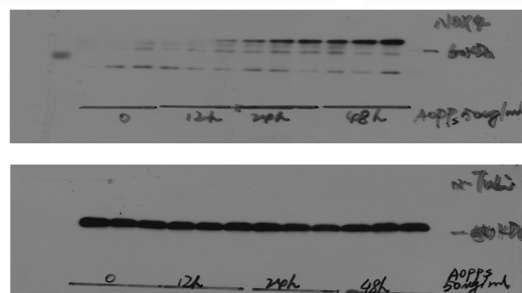

Figure 3K

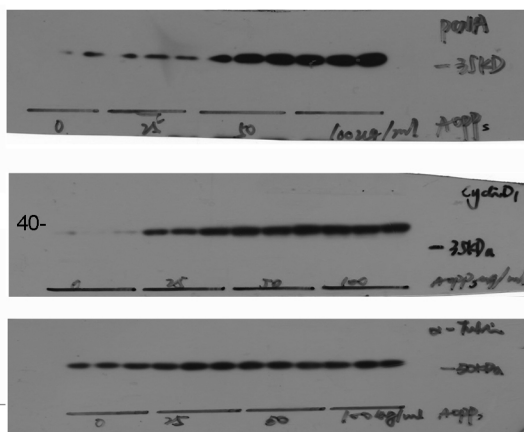

Figure 3M

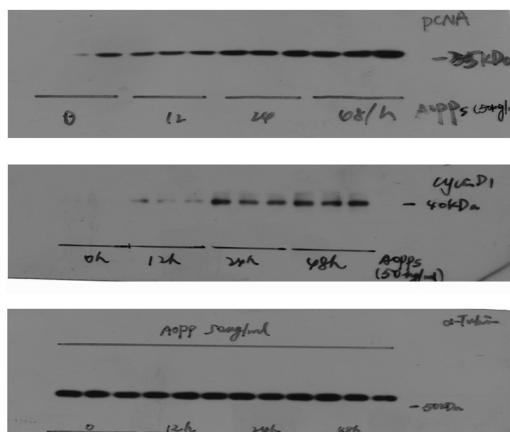

Figure 3P

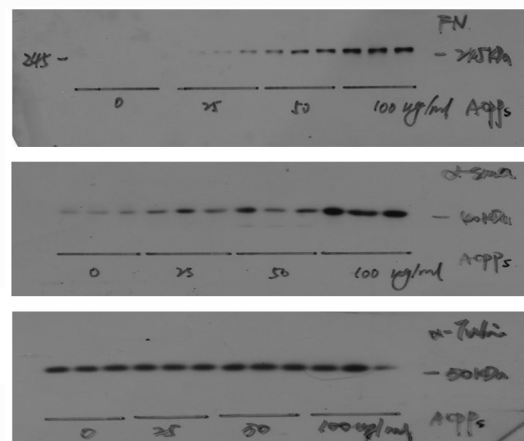

Figure 3S

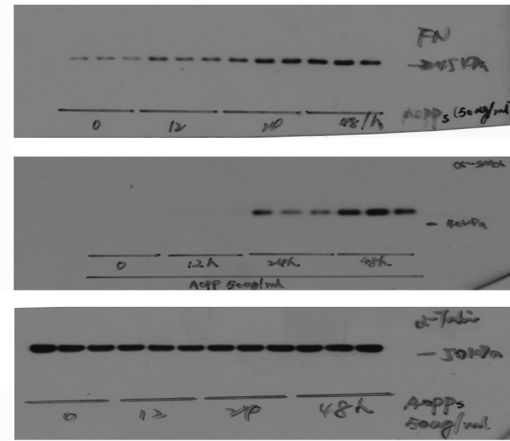

Figure 4C

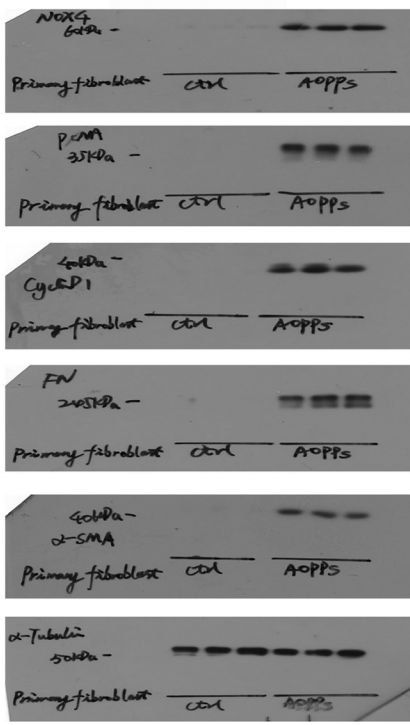

Figure 4E

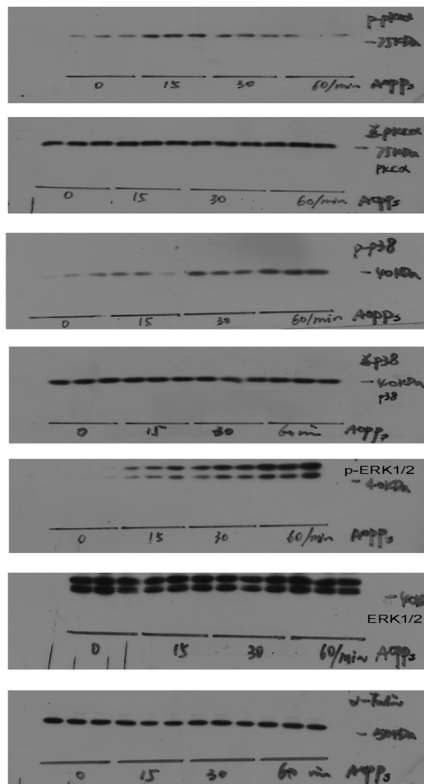

Figure 4G

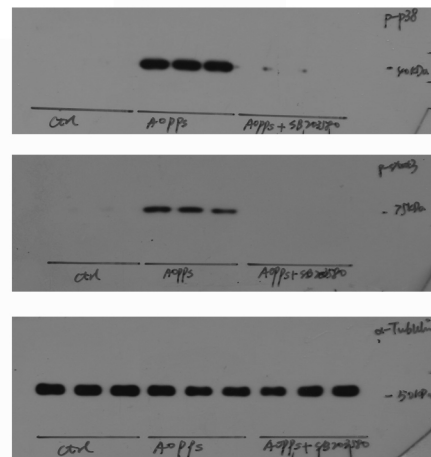

Figure 4H

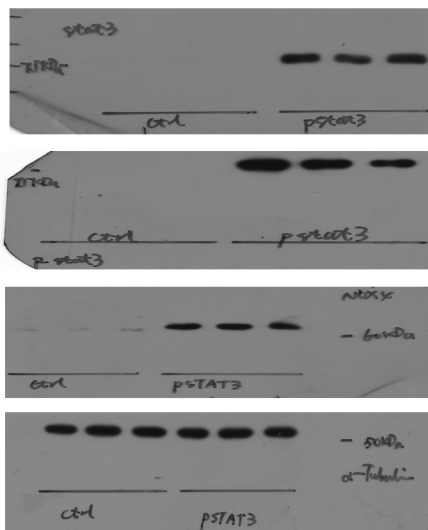

Figure 4I

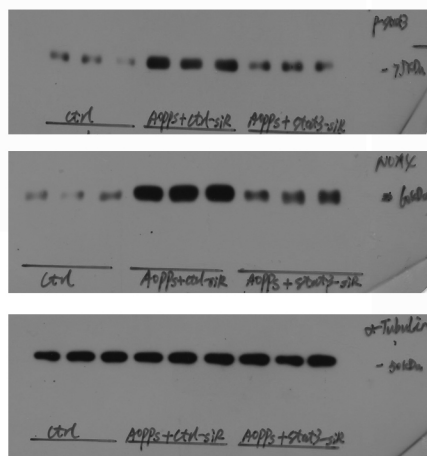

Figure 4J

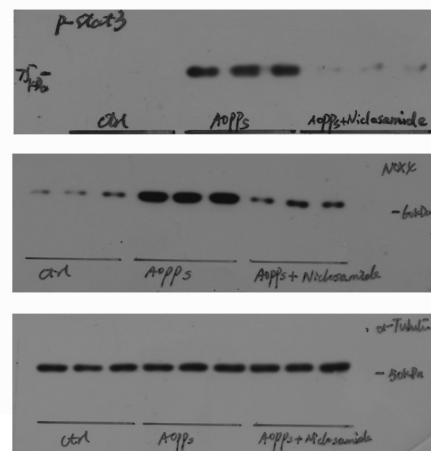

Figure 5A

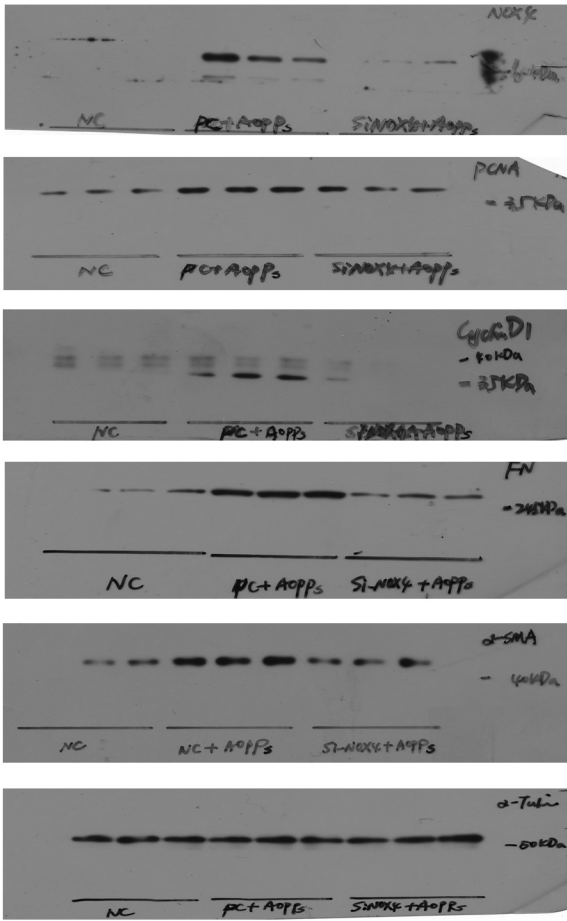

Figure 5L

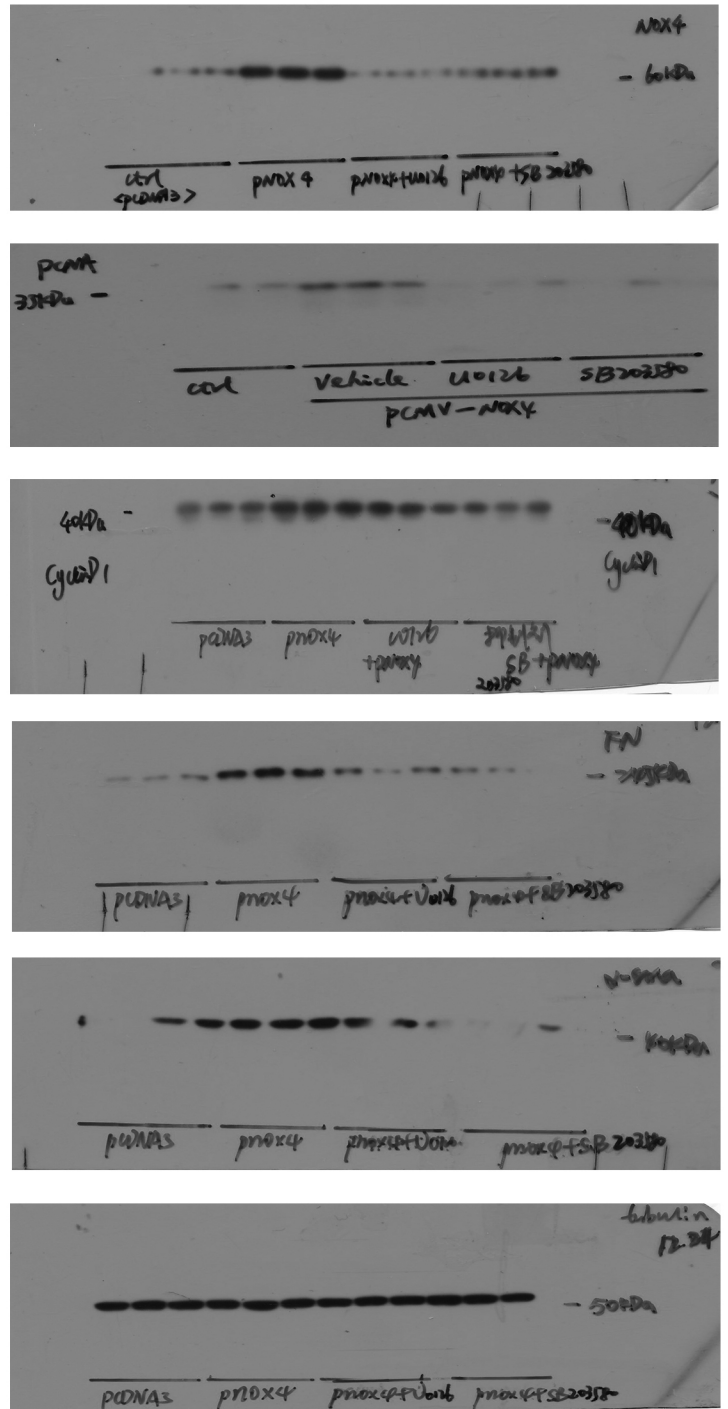

Figure 5H

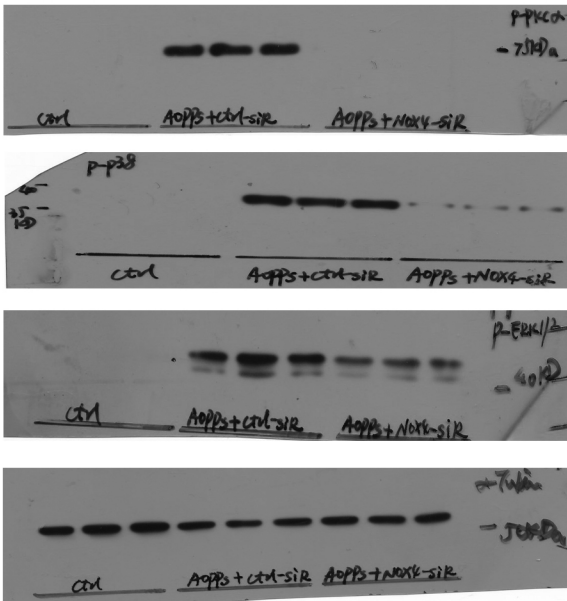

Figure 6E

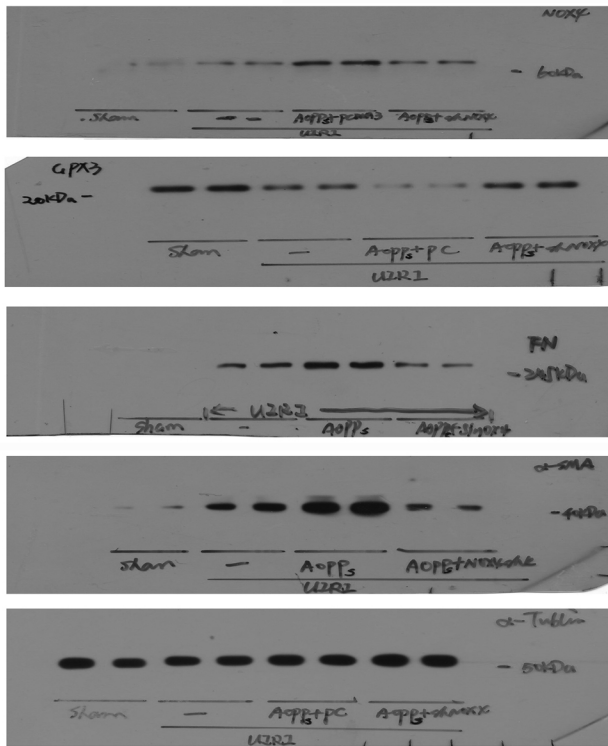

Figure 6H

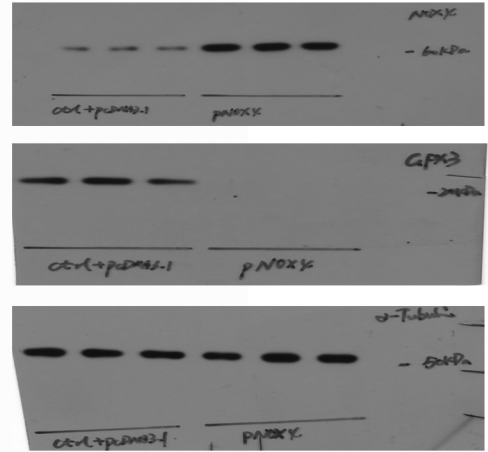

Figure 6J

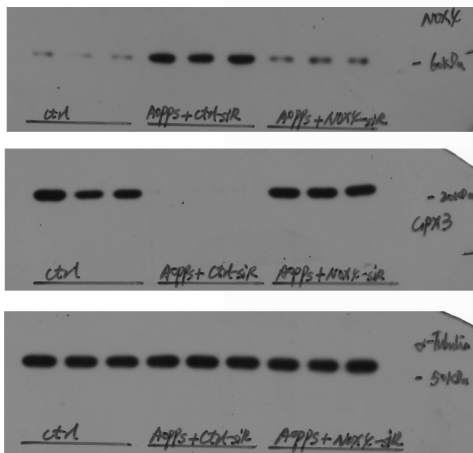

Figure 6L

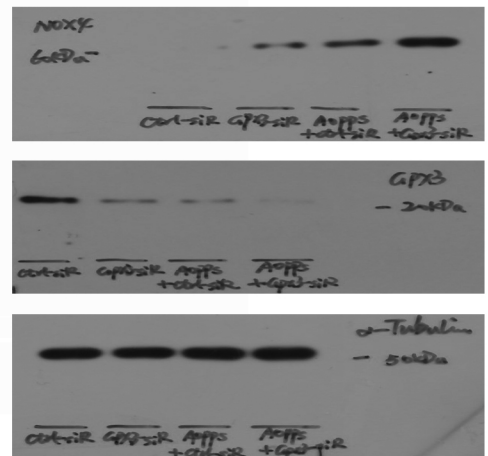

Figure 7A

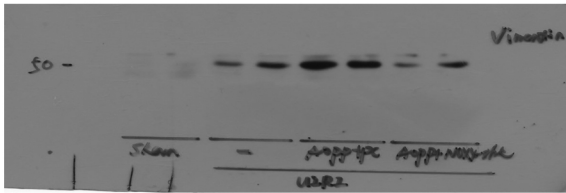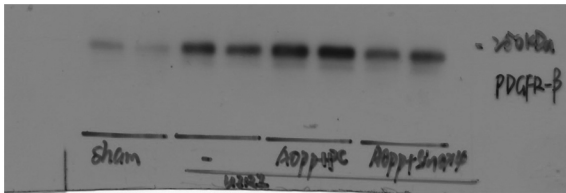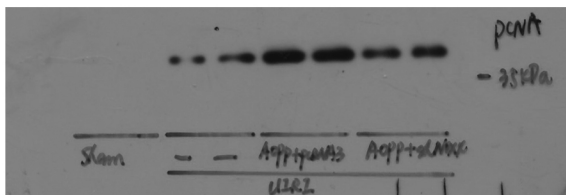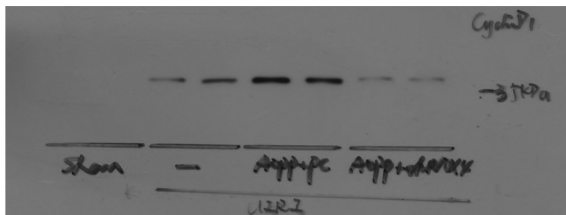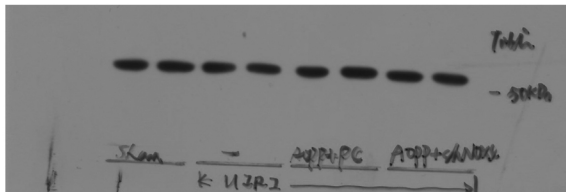

Figure 7G

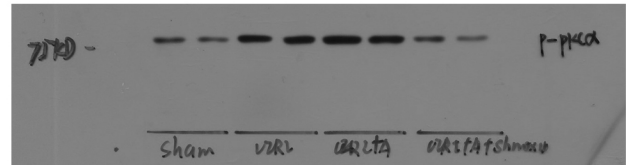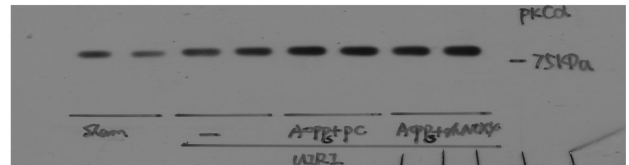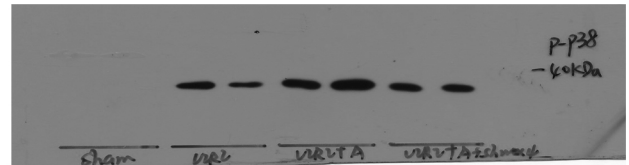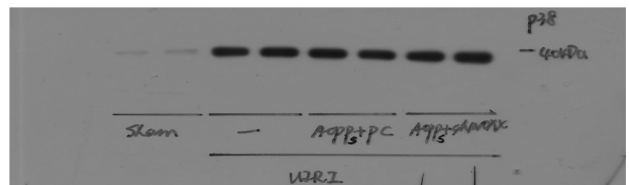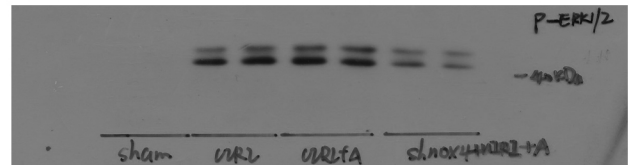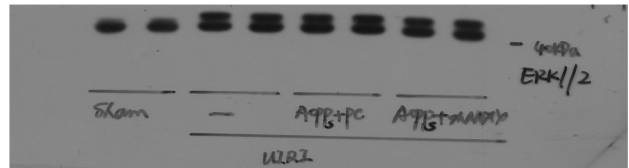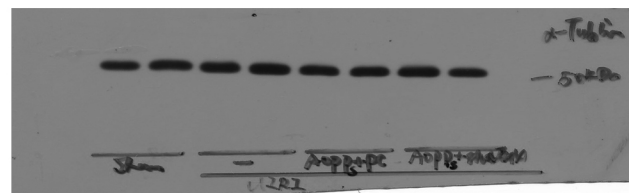

Figure 8B

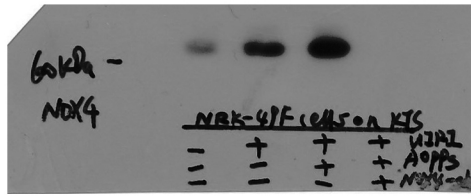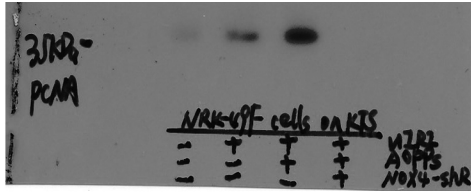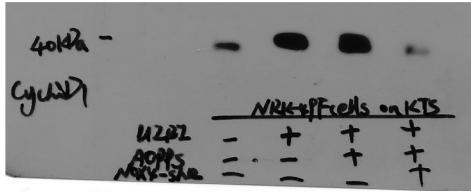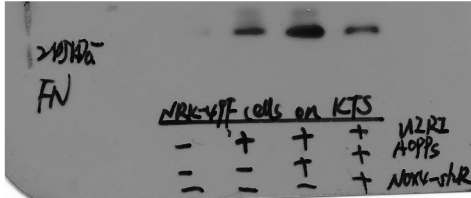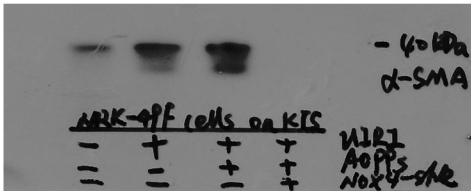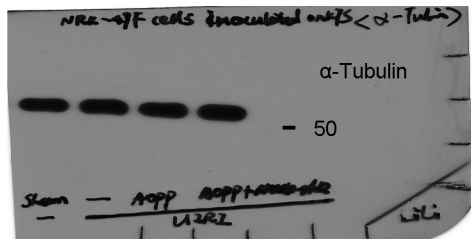

Supplement: mmc2.pdf [file mmc2.pdf]
