# Supplementary material for: Oxidatively stressed extracellular microenvironment drives fibroblast activation and kidney fibrosis
Source: PubMed Central journal article supplement — Redox Biol. 2023 Sep 1;67:102868. doi: 10.1016/j.redox.2023.102868 (PMC10497796; doi:10.1016/j.redox.2023.102868), 2023-09-01
Supplement: mmc1.pdf [file mmc1.pdf]

## Oxidatively stressed extracellular microenvironment drives fibroblast activation and kidney fibrosis

Li Li<sup>a1\*</sup>, Meizhi Lu<sup>a1</sup>, Yiling Peng<sup>a1</sup>, Junxin Huang<sup>a</sup>, Xiaoman Tang<sup>a</sup>, Jian Chen<sup>c</sup>, Jing Li<sup>b</sup>, Xue Hong<sup>a</sup>,  
Meizhi He<sup>a</sup>, Haiyan Fu<sup>a</sup>, Ruiyuan Liu<sup>c</sup>, Fan Fan Hou<sup>a</sup>, Lili Zhou<sup>a\*</sup> and Youhua Liu<sup>a\*</sup>

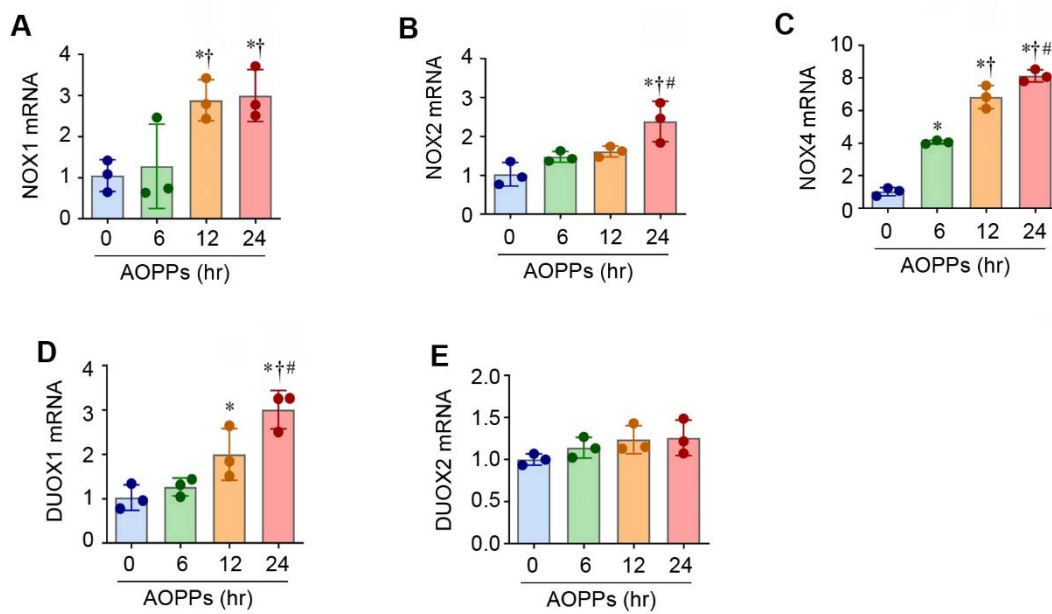

**Fig. S1.** AOPPs induces NADPH oxidase expression in renal interstitial fibroblasts in vitro. (A-E) qRT-PCR analyses show mRNA levels of NOX1, NOX2, NOX4, DUOX1 and DUOX2 in different groups as indicated. \* $P < 0.05$  versus controls, † $P < 0.05$  versus AOPP 6 h, # $P < 0.05$  versus AOPP 12 h (n = 3).

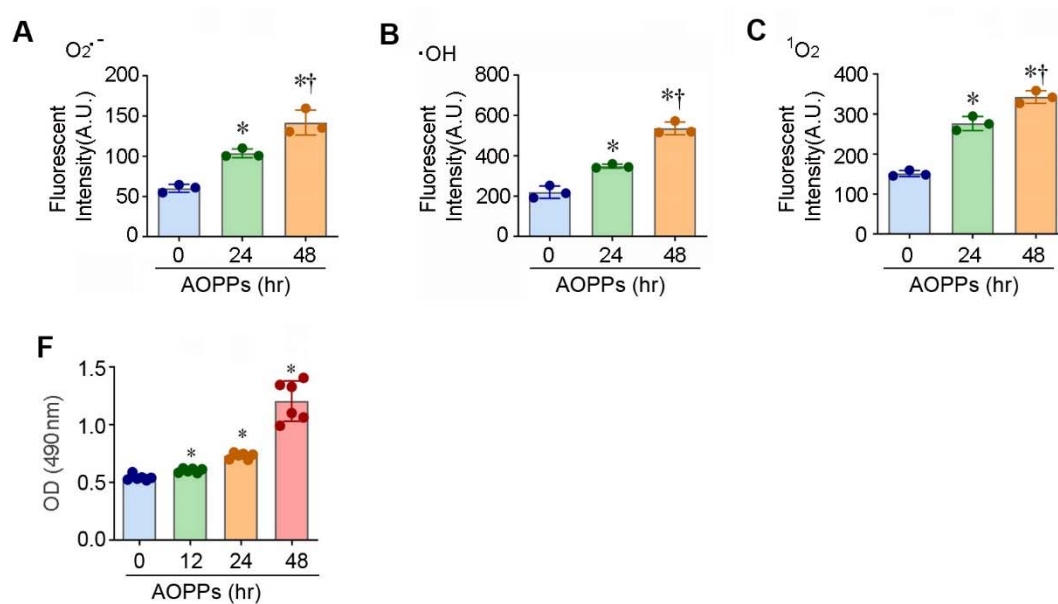

**Fig. S2.** AOPPs increased ROS production in renal fibroblasts and promotes cell proliferation. NRK-49F cells were treated with AOPPs (50  $\mu\text{g}/\text{ml}$ ) for various periods of time as indicated. The fluorescence intensity of superoxide radical anion ( $O_2^{\bullet -}$ ) (A), hydroxyl radical ( $\bullet OH$ ) (B) and singlet oxygen ( $^1O_2$ ) (C) in cell supernatants were measured by a fluorescence spectrophotometer. \* $P < 0.05$  versus controls, † $P < 0.05$  versus AOPP 24 h ( $n = 3$ ). (D) Quantitative colorimetric MTT assay shows that AOPPs promoted NRK-49F cells proliferation in a time-dependent manner. OD, optical density. NRK-49F cells were treated with AOPPs (50  $\mu\text{g}/\text{ml}$ ) for various periods of time as indicated. \* $P < 0.05$  versus controls.

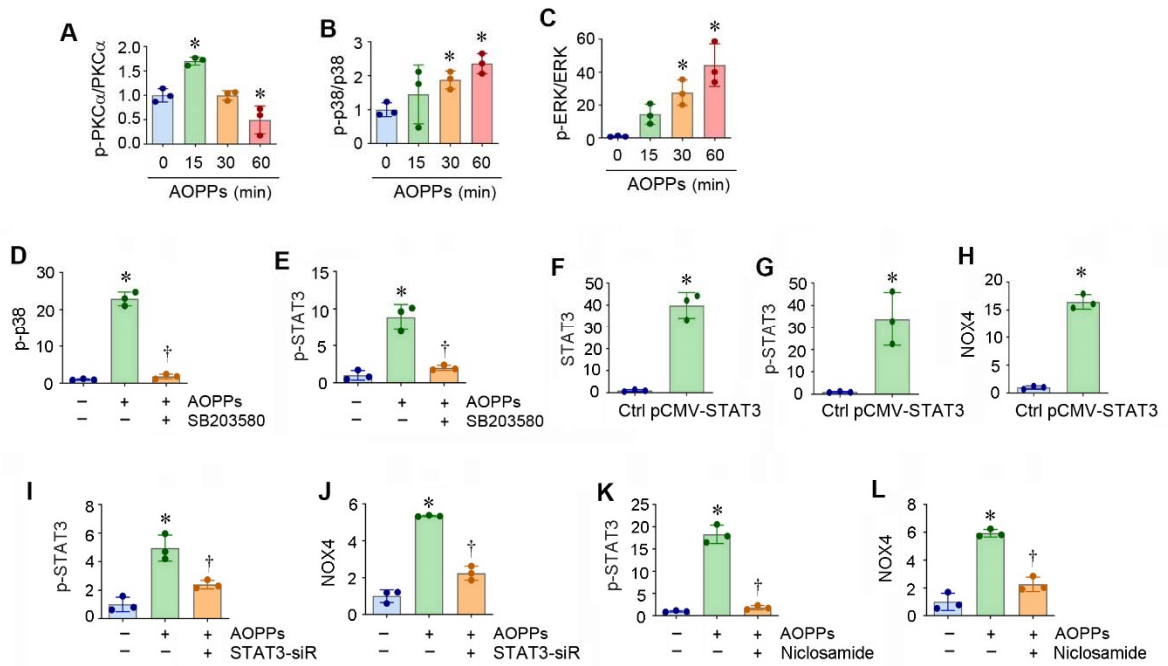

**Fig. S3.** Activation of NOX4 by AOPPs activates PKC $\alpha$ /MAPK/STAT3/NOX4 signal cascade in vitro. (A-C) Quantitative data of Western blot analyses show that AOPPs activated PKC $\alpha$ /MAPK signal cascade. NRK-49F cells were treated with AOPPs (50  $\mu$ g/ml) for various periods of time as indicated. Cell lysates were subjected to Western blot analyses for p-PKC $\alpha$ , PKC $\alpha$ , p-p38, p38, p-ERK1/2, ERK1/2 and  $\alpha$ -tubulin. \* $P$  < 0.05 versus controls (n=3). (D, E) Quantitative data of Western blot analyses show that blockade of p-p38 suppressed p-STAT3 expression in NRK-49F cells. NRK-49F cells were pretreated with p38 inhibitor SB203580 (10  $\mu$ M) for 1 h, then treated with AOPPs (50  $\mu$ g/ml) for 30 min. \* $P$  < 0.05 versus controls, † $P$  < 0.05 versus AOPPs (50  $\mu$ g/ml) (n=3). (F-H) Quantitative data of Western blot analyses show that overexpression of STAT3 induced the expression of NOX4 in NRK-49F cells. \* $P$  < 0.05 versus controls. (I, J) Quantitative data of Western blot analyses show that knockdown of STAT3 inhibited AOPPs-induced NOX4 expression in NRK-49F cells. \* $P$  < 0.05 versus controls, † $P$  < 0.05 versus AOPPs (50  $\mu$ g/ml) (n=3). (K, L) Quantitative data of Western blot analyses show that blockade of p-STAT3 suppressed AOPP-induced NOX4 expression in NRK-49F cells. NRK-49F cells were pretreated with STAT3 inhibitor Niclosamide (5  $\mu$ M) overnight, then treated with AOPPs (50  $\mu$ g/ml) for 24 h. \* $P$  < 0.05 versus controls, † $P$  < 0.05 versus AOPPs (50  $\mu$ g/ml) (n=3).

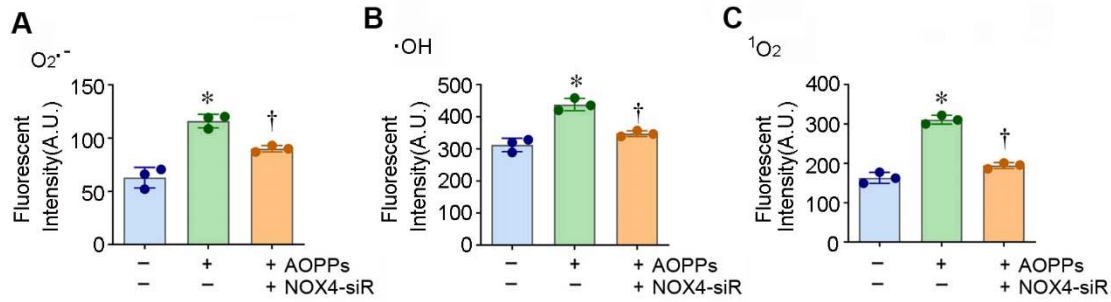

**Fig. S4.** Knockdown of NOX4 reduces ROS production in renal fibroblasts. NRK-49F cells were transfected with either control siRNA or NOX4-siRNA for 24 h, and then cells were treated with AOPPs (50  $\mu\text{g/ml}$ ) for additional 24 h. The fluorescence intensity of superoxide radical anion ( $O_2^{\bullet-}$ ) (A), hydroxyl radical ( $\bullet OH$ ) (B) and singlet oxygen ( $^1O_2$ ) (C) in cell supernatants were measured by a fluorescence spectrophotometer. \* $P < 0.05$  versus controls, † $P < 0.05$  versus AOPPs (50  $\mu\text{g/ml}$ ) (n = 3).

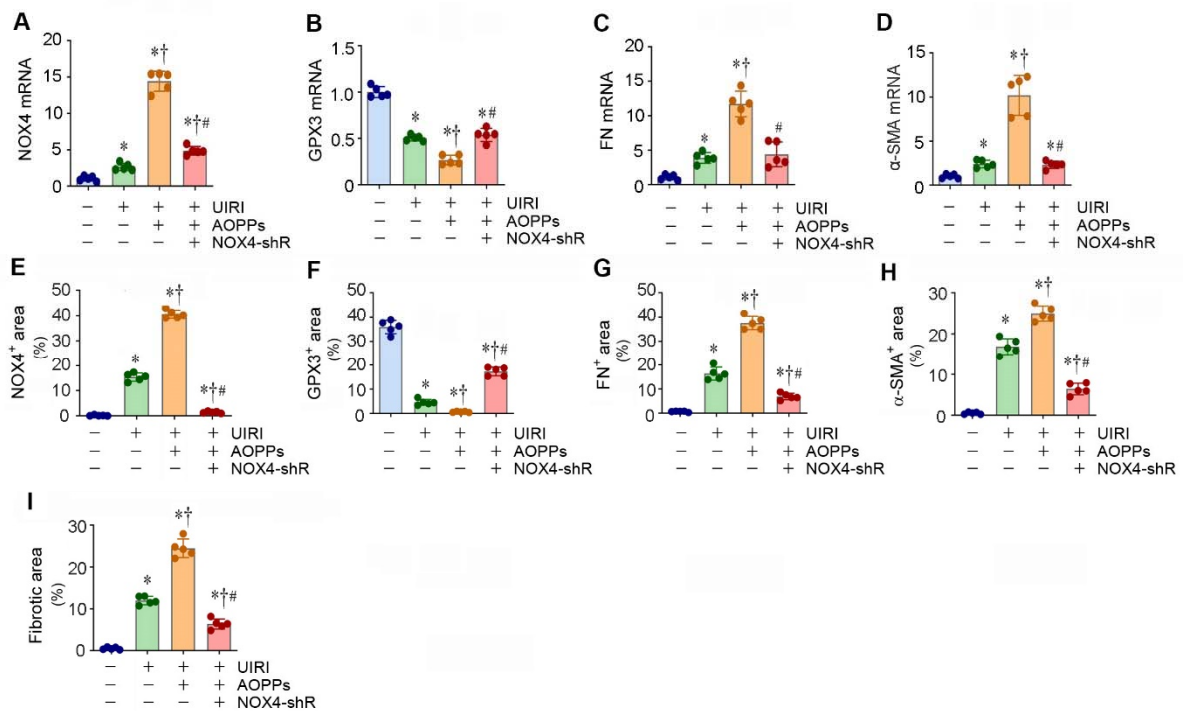

**Fig.S5.** Knockdown of NOX4 ameliorates fibrosis-related gene expression induced by AOPPs in vivo. (A-D) qRT-PCR analyses show mRNA levels of NOX4, GPX3, FN and  $\alpha$ -SMA in different groups as indicated. \* $P < 0.05$  versus sham; † $P < 0.05$  versus UIRI; # $P < 0.05$  versus UIRI+AOPPs (n=5). (E-I) Graphic presentation shows the semi-quantitative determination of renal NOX4<sup>+</sup>, GPX3<sup>+</sup>, FN<sup>+</sup> and  $\alpha$ -SMA<sup>+</sup> area and fibrotic lesions in different groups. At least 10 randomly selected fields were assessed, and results averaged for each kidney. \* $P < 0.05$  versus sham; † $P < 0.05$  versus UIRI; # $P < 0.05$  versus UIRI+AOPPs (n=5).

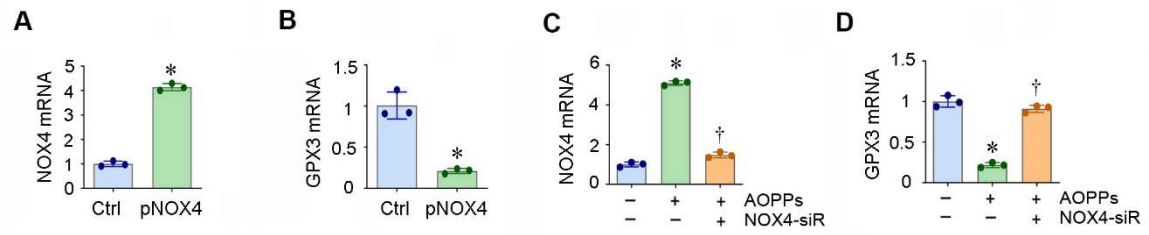

**Fig. S6.** Overexpression of NOX4 inhibits GPX3 mRNA expression and knockdown of NOX4 restores GPX3 mRNA expression in HK-2 cells. (A, B) qRT-PCR analyses show that overexpression of NOX4 inhibited GPX3 mRNA in HK-2 cells. HK-2 cells were transfected with pcDNA3 or pCMV-NOX4 plasmids for 24 h. \* $P < 0.05$  versus controls. (C, D) qRT-PCR analyses show that knockdown of NOX4 restored GPX3 gene expression after AOPPs treatment in HK-2 cells. HK-2 cells were transfected with either control siRNA or NOX4-siRNA for 24 h, and then cells were treated with AOPPs (50  $\mu\text{g/ml}$ ) for additional 24 h. \* $P < 0.05$  versus controls, † $P < 0.05$  versus AOPPs (50  $\mu\text{g/ml}$ ) (n=3).

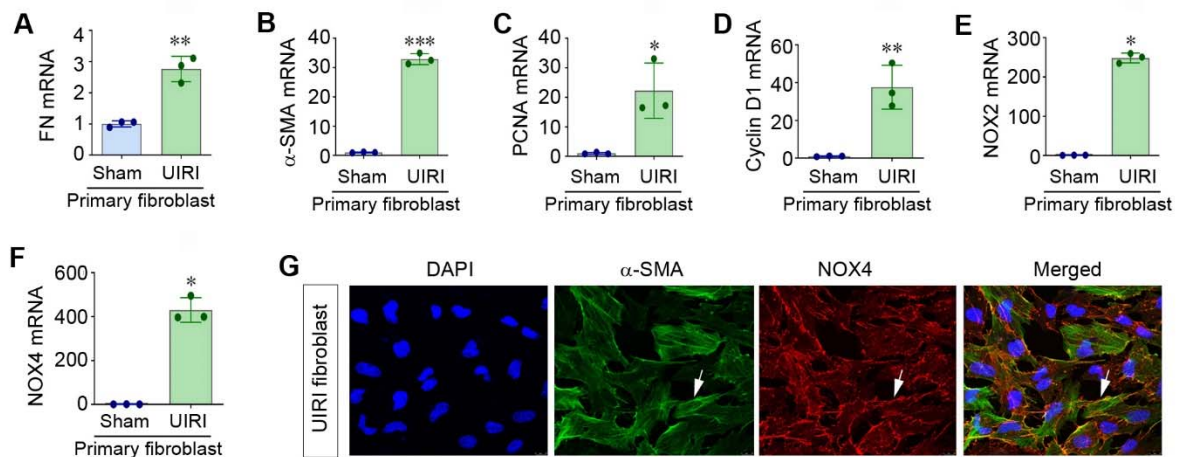

**Fig. S7.** Primary fibroblasts from the fibrotic kidney express high-level mRNA of fibrosis-related genes. (A-F) qRT-PCR analyses show mRNA levels of FN,  $\alpha$ -SMA, PCNA, cyclin D1, NOX2 and NOX4 in different groups as indicated. Primary fibroblasts were extracted from sham and UIRI mice and then were cultured for 24 h. \* $P < 0.05$ ; \*\* $P < 0.01$ ; \*\*\* $P < 0.001$  versus sham (n=3). (G) Representative micrographs show the expression and localization of  $\alpha$ -SMA and NOX4 in UIRI primary fibroblasts by co-immunofluorescence staining. Arrows indicate positive staining.

Supplementary Table S1. The sources of antibodies used in this study

| Antibodies                  | Catalogue number | Company                      | Location              |
|-----------------------------|------------------|------------------------------|-----------------------|
| <b>Primary antibodies</b>   |                  |                              |                       |
| anti-Gpx3                   | Ab256470         | Abcam                        | Cambridge, MA         |
| anti-NOX4                   | BA2813           | Boster Biological Technology | Wuhan, China          |
| anti-PCNA                   | sc-56            | Santa Cruz Biotechnology     | Santa Cruz, CA        |
| anti-Cyclin D1              | sc-8396          | Santa Cruz Biotechnology     | Santa Cruz, CA        |
| anti-fibronectin            | F3648            | Sigma-Aldrich                | St. Louis, MO         |
| anti- $\alpha$ -SMA         | A2547            | Sigma-Aldrich                | St. Louis, MO         |
| anti-c-fos                  | BA0207-2         | Boster Biological Technology | Wuhan, China          |
| anti-p-p38                  | 9211S            | Cell Signaling Technology    | Danvers, MA           |
| anti-p38                    | 9212S            | Cell Signaling Technology    | Danvers, MA           |
| anti-p-PKC $\alpha$         | sc-377565        | Santa Cruz Biotechnology     | Santa Cruz, CA        |
| anti-PKC $\alpha$           | 59754            | Cell Signaling Technology    | Danvers, MA           |
| anti-p-ERK1/2               | 9101S            | Cell Signaling Technology    | Danvers, MA           |
| anti-ERK1/2                 | 4695S            | Cell Signaling Technology    | Danvers, MA           |
| anti-p-STAT3                | 9145S            | Cell Signaling Technology    | Danvers, MA           |
| anti-STAT3                  | 9139S            | Cell Signaling Technology    | Danvers, MA           |
| anti-Vimentin               | 5741s            | Cell Signaling Technology    | Danvers, MA           |
| anti-PDGFR- $\beta$         | sc-432           | Santa Cruz Biotechnology     | Santa Cruz, CA        |
| anti-E-cadherin             | 3195s            | Cell Signaling Technology    | Danvers, MA           |
| anti- $\alpha$ -Tubulin     | RM2007           | Ray Antibody Biotech         | Peachtree Corners, GA |
| <b>Secondary antibodies</b> |                  |                              |                       |
| Goat anti-mouse             | BA1050           | Boster Biological Technology | Wuhan, China          |
| Goat anti-rabbit            | BA1054           | Boster Biological Technology | Wuhan, China          |

**Supplementary Table S2. Nucleotide sequences of the primers used for qPCR**

| <b>Mouse<br/>gene</b> | <b>Primer Sequence 5' to 3'</b> |                       |
|-----------------------|---------------------------------|-----------------------|
|                       | <b>Forward</b>                  | <b>Reverse</b>        |
| <i>Fibronectin</i>    | GATGAGCTTCCCCAACTGGT            | CTGGGTTGTTGGTGGGATGT  |
| <i>α-SMA</i>          | CATCGTGTGGATTCTGGGG             | GTCACGAAGGAATAGCCACG  |
| <i>Gpx3</i>           | CATCCTGCCTTCTGTCCCTG            | CGATGGTGAGGGCTCCATAC  |
| <i>NOX4</i>           | TGTCTGCATGGTGGTGGTAT            | CTTCAACAAGCCACCCGAAA  |
| <i>NOX1</i>           | CGAAGTGGCTGTACTGGTTG            | AAAGGCACCCGTCTCTCTAC  |
| <i>NOX2</i>           | TGCACATCTGTTCAACGTGG            | AACCGAGTCACAGCCACATA  |
| <i>Duox1</i>          | TGTGTACCAGCCCTTGAGAG            | TGTTTCCACACTCACCAGGT  |
| <i>Duox2</i>          | CTGCGGTTTGGGTCATATGG            | TACAATCAGCCAAGCCCAGA  |
| <i>PCNA</i>           | AAGTTTTCTGCGAGTGGGGA            | ACAGTGGAGTGGCTTTTGTGA |
| <i>CyclinD1</i>       | TCAAGTGTGACCCGGACTG             | GACCAGCTTCTTCCTCCACTT |
| <i>β-actin</i>        | AAGATCAAGATCATTGCTCCTCTG        | CGCAGCTCAGTAACAGTCCG  |
